# Supplementary material for: ACVIM consensus statement on the treatment of immune thrombocytopenia in dogs and cats
Source: PubMed Central journal article supplement — J Vet Intern Med. 2024 May 23;38(4):1982–2007. doi: 10.1111/jvim.17079 (PMC11256181; doi:10.1111/jvim.17079), 2024-05-23
Supplement: JVIM-38-1982-s003.pdf [file JVIM-38-1982-s003.pdf]

**Supporting information 6: PICO Evidence Summary Template for the ACVIM Consensus Statement on the Treatment of Immune Thrombocytopenia in Dogs and Cats**

**1. Basic demographics:**

PLEASE INSERT YOUR NAME, THE DATE OF SUBMISSION FOR REVIEW, AND YOUR CONTACT INFORMATION.

|                                                        |  |                |  |
|--------------------------------------------------------|--|----------------|--|
| Name of evidence evaluator                             |  | Date submitted |  |
| Institutional affiliation / Mailing address (for JVIM) |  | Email address  |  |
|                                                        |  | Phone number   |  |

**2. PICO / PECO question:**

INSERT YOUR QUESTION HERE. PLEASE DO NOT ALTER THEM.

**3. Specific conflict of interest statement:**

A BRIEF DECLARATION REGARDING ANY RELEVANT CONFLICTS IS REQUIRED FOR EACH WORKSHEET ON BEHALF OF ALL AUTHORS. INSERT ANY AND ALL POTENTIAL CONFLICTS OF INTEREST HERE, EVEN IF THEY SEEM TRIVIAL

**4. Search strategy (including electronic databases searched):**

**4a. Databases**

DID YOU SEARCH ANY DATABASES TO AUGMENT YOUR REFERENCES? IF SO, INSERT THEM HERE

**4b. Other sources**

DID YOU USE ANY OTHER SOURCES TO FIND ARTICLES? INSERT THOSE HERE

DID YOU DO A SCOPUS SEARCH? OR WAS ONE PERFORMED FOR YOU BY DR. MACKIN? IF SO, WHAT ARTICLE WAS IDENTIFIED THAT WAS USED?

**4c. State inclusion and exclusion criteria for choosing studies and list number of studies excluded per criterion**

HOW DID YOU CHOOSE THE STUDIES FROM THE 273 ORIGINAL ARTICLES?

HOW WERE OTHER STUDIES FROM ADDITIONAL TARGETED SEARCHES SELECTED?

IF YOU PERFORMED DATABASE SEARCHES YOU CAN INCLUDE THE SEARCH STRATEGIES USED AND THE NUMBER OF ARTICLES RETRIEVED.

**4d. Final number of articles for inclusion in systematic review:**

TOTAL N ARTICLES SELECTED FOR INCLUSION

THESE SHOULD ALL BE IN REFERENCES LIST BELOW

**5. Summary of evidence**

ONCE THE LIST OF ARTICLES IS FINALIZED, YOU WILL REVIEW EACH STUDY INDIVIDUALLY IN DETAIL TO DETERMINE TYPE, QUALITY AND APPLICABILITY TO THE PICO/PECO QUESTION USING THE DATA EXTRACTION EXCEL SHEETS.

PLEASE LIST THE STUDIES THAT SUPPORT, ARE NEUTRAL TO, OR OPPOSE THE PICO/PECO QUESTION.

EVIDENCE SUPPORTING THE PICO/PECO QUESTION  
LIST THE ARTICLES THAT SUPPORTED THE PICO/PECO QUESTION

EVIDENCE NEUTRAL TO THE PICO/PECO QUESTION  
LIST THE ARTICLES THAT WERE NEUTRAL TO THE PICO/PECO QUESTION

EVIDENCE AGAINST THE PICO/PECO QUESTION  
LIST THE ARTICLES THAT REFUTED THE PICO/PECO QUESTION

#### 6. Reviewer's comments

SUCCINCTLY DESCRIBE THE RESULTS OF YOUR REVIEW AND DISCUSS YOUR FINDINGS. THIS IS BEST DONE AS AN EVIDENCE SYNTHESIS, BUT PLEASE DO CALL OUT AND CITE INDIVIDUAL ARTICLES TO SUPPORT YOUR COMMENTS.

#### 7. Conclusions/ Consensus on science

CREATE A SUMMARY STATEMENT ENCOMPASSING THE BODY OF EVIDENCE YOU REVIEWED. THE GENERIC FORMAT FOR THESE STATEMENTS IS AS FOLLOWS:

DOG

EVIDENCE FROM # [STUDY DESIGN AND HIGHEST QUALITY] STUDIES IN [DOG POPULATION STUDIED] SUGGEST IMPROVEMENT IN [OUTCOME MEASURE] WHEN [INTERVENTION/EXPOSURE/EVALUATION] IS COMPARED TO [CONTROL].

CAT

EVIDENCE FROM # [STUDY DESIGN AND HIGHEST QUALITY] STUDIES IN [CAT POPULATION STUDIED] SUGGEST IMPROVEMENT IN [OUTCOME MEASURE] WHEN [INTERVENTION/EXPOSURE/EVALUATION] IS COMPARED TO [CONTROL].

#### 8. Diagnostic or Treatment recommendation

ON THE BASIS OF YOUR REVIEW, THE SUMMARY AND CONCLUSIONS ABOVE, NOW SUGGEST A GUIDELINE RECOMMENDATION THAT ENCOMPASSES THE EVIDENCE YOU HAVE ASSESSED.

THE GENERIC PICO FORMAT IS AS FOLLOWS:

IN [POPULATION STUDIED] FOR MANAGEMENT OF PRIMARY ITP, USE OF [INTERVENTION] IS [RECOMMENDED / SHOULD BE CONSIDERED / CAN BE CONSIDERED / IS NOT RECOMMENDED].

THE GENERIC PECO FORMAT FOR DIAGNOSIS IS AS FOLLOWS:

IN [POPULATION STUDIED] EVALUATION OF [RISK FACTOR] AS OPPOSED TO PLATELET COUNT ALONE IS [STRONGLY / MODERATELY / WEAKLY / NOT] ASSOCIATED WITH DIFFERENTIATION OF ITP FROM NON-IMMUNE THROMBOCYTOPENIA.

THE GENERIC PECO FORMAT FOR DIAGNOSTIC SEVERITY IS AS FOLLOWS:

IN [POPULATION STUDIED] EXPOSURE TO [RISK FACTOR] AS OPPOSED TO REMAINING DISEASE FREE IS [STRONGLY / MODERATELY / WEAKLY / NOT] ASSOCIATED WITH WORSE DISEASE OUTCOMES.

OR

IN [POPULATION STUDIED] EVALUATION OF [RISK FACTOR] AS OPPOSED TO PLATELET COUNT ALONE IS [STRONGLY / MODERATELY / WEAKLY / NOT] ASSOCIATED WITH PREDICTING WORSE DISEASE OUTCOMES.

**9. Knowledge gaps**

PROVIDE A STATEMENT ON IMPORTANT GAPS IN KNOWLEDGE THAT HINDER A MORE CONFIDENT RECOMMENDATION.

PLEASE DO FOR DOGS AND CATS SEPARATELY.

**Acknowledgements**

PLEASE INSERT ANY APPLICABLE ACKNOWLEDGEMENTS

**10. Citation list**

PLEASE INSERT YOUR CITATIONS FORMATTED PER J VET INTERN MED. EXAMPLE AS FOLLOWS:

Garden OA, Kidd L, Mexas AM, et al. ACVIM consensus statement on the diagnosis of immune-mediated hemolytic anemia in dogs and cats. *J Vet Intern Med.* 2019;33:313-334.
