# Supplementary material for: ACVIM consensus statement on the treatment of immune thrombocytopenia in dogs and cats
Source: PubMed Central journal article supplement — J Vet Intern Med. 2024 May 23;38(4):1982–2007. doi: 10.1111/jvim.17079 (PMC11256181; doi:10.1111/jvim.17079), 2024-05-23
Supplement: JVIM-38-1982-s007.pdf [file JVIM-38-1982-s007.pdf]

## Supporting information 2: Bibliography of studies for treatment

### Studies identified via systematic search of bibliographic databases

1. Akiyoshi, M., Hisasue, M., Neo, S., & Akiyoshi, M. (2021). Presumptive hemophagocytic syndrome associated with immune-mediated anemia in two Miniature Dachshunds. *Journal of Veterinary Medical Science*, 83(4), 689–694. <https://doi.org/10.1292/jvms.20-0566>
2. Allen, E. C., Tarigo, J. L., LeVine, D. N., Barber, J. P., & Brainard, B. M. (2021). Platelet number and function in response to a single intravenous dose of vincristine. *Journal of Veterinary Internal Medicine*, 35(4), 1754–1762. <https://doi.org/10.1111/jvim.16169>
3. Antognoni, M. T., Veronesi, F., & Morganti, G. (2014). Natural infection of *Anaplasma platys* in dogs from Umbria region (Central Italy). *Veterinaria Italiana*, 50, 59–56. <https://doi.org/10.12834/VetIt.82.258.2>
4. Atkinson, M. (2011). IMT in spaniel after vaccination. *Veterinary Times*, 41(7), 1–13.
5. Aubert, I., Carrier, M., Desnoyers, M., & Breton, L. (1997). Un cas d'hyphéma bilatéral secondaire à une thrombocytopénie à médiation immunitaire chez un chien. *Médecin Vétérinaire Du Québec*, 27(3), 103–108.
6. Aubert, I., & Daminet, S. (1996). Diagnostic de la thrombocytopénie à médiation immunitaire: Revue de littérature et étude rétrospective. *Médecin Vétérinaire Du Québec*, 26(4), 152–153.
7. Bach, J. F., Mahony, O. M., Tidwell, A. S., & Rush, J. E. (2007). Brain abscess and bacterial endocarditis in a Kerry Blue Terrier with a history of immune-mediated thrombocytopenia. *Journal of Veterinary Emergency and Critical Care*, 17(4), 409–415. <https://doi.org/10.1111/j.1476-4431.2007.00245.x>
8. Bachman, D. E., Forman, M. A., Hostutler, R. A., Corn, S., Lin, J., & Kociba, G. J. (2015). Prospective diagnostic accuracy evaluation and clinical utilization of a modified assay for platelet-associated immunoglobulin in thrombocytopenic and nonthrombocytopenic dogs. *Veterinary Clinical Pathology*, 44(3), 355–368. <https://doi.org/10.1111/vcp.12281>
9. Back, F. P., Lacerda, L. de A., & Ventura, F. V. C. (2013). Human intravenous immunoglobulin for the treatment of immune-mediated thrombocytopenia in dog—Case report. *Acta Veterinaria Brasilica*, 7(S1), 535–536.
10. Bailiff, N. L., & Norris, C. R. (2002). Clinical Signs, Clinicopathological Findings, Etiology, and Outcome Associated With Hemoptysis in Dogs: 36 Cases (1990–1999). *Journal of the American Animal Hospital Association*, 38(2), 125–133. <https://doi.org/10.5326/0380125>
11. Balog, K., Huang, A. A., Sum, S. O., Moore, G. E., Thompson, C., & Scott-Moncrieff, J. C. (2013). A Prospective Randomized Clinical Trial of Vincristine versus Human Intravenous Immunoglobulin for Acute Adjunctive Management of Presumptive Primary Immune-Mediated Thrombocytopenia in Dogs. *Journal of Veterinary Internal Medicine*, 27(3), 536–541. <https://doi.org/10.1111/jvim.12066>
12. Best, M., & Fry, D. (2014). Primary immune-mediated thrombocytopenia and immune-mediated neutropenia suspected in a 21-week-old Maine Coon cat. *Australian Veterinary Journal*, 92(7), 250–253. <https://doi.org/10.1111/avj.12186>

13. Bexfield, N. H., Villiers, E. J., & Herrtage, M. E. (2005). Immune-mediated haemolytic anaemia and thrombocytopenia associated with *Anaplasma phagocytophilum* in a dog. *Journal of Small Animal Practice*, 46(11), 543–548. <https://doi.org/10.1111/j.1748-5827.2005.tb00284.x>
14. Bianco, D., Armstrong, P. J., & Washabau, R. J. (2007). Treatment of Severe Immune-Mediated Thrombocytopenia with Human IV Immunoglobulin in 5 Dogs. *Journal of Veterinary Internal Medicine*, 21(4), 694–699. <https://doi.org/10.1111/j.1939-1676.2007.tb03010.x>
15. Bianco, D., Armstrong, P. J., & Washabau, R. J. (2008). Presumed primary immune-mediated thrombocytopenia in four cats. *Journal of Feline Medicine and Surgery*, 10(5), 495–500. <https://doi.org/10.1016/j.jfms.2008.01.003>
16. Bianco, D., Armstrong, P. J., & Washabau, R. J. (2009). A Prospective, Randomized, Double-Blinded, Placebo-Controlled Study of Human Intravenous Immunoglobulin for the Acute Management of Presumptive Primary Immune-Mediated Thrombocytopenia in Dogs. *Journal of Veterinary Internal Medicine*, 23(5), 1071–1078. <https://doi.org/10.1111/j.1939-1676.2009.0358.x>
17. Bianco, D., & Hardy, R. M. (2009). Treatment of Evans' Syndrome With Human Intravenous Immunoglobulin and Leflunomide in a Diabetic Dog. *Journal of the American Animal Hospital Association*, 45(3), 147–150. <https://doi.org/10.5326/0450147>
18. Birkenheuer, A. J., Correa, M. T., Levy, M. G., & Breitschwerdt, E. B. (2005). Geographic distribution of babesiosis among dogs in the United States and association with dog bites: 150 cases (2000–2003). *Journal of the American Veterinary Medical Association*, 227(6), 942–947. <https://doi.org/10.2460/javma.2005.227.942>
19. Bloom, J. C., Blackmer, S. A., Bugelski, P. J., Sowinski, J. M., & Saunders, L. Z. (1985). Gold-induced Immune Thrombocytopenia in the Dog. *Veterinary Pathology*, 22(5), 492–499. <https://doi.org/10.1177/030098588502200509>
20. Bloom, J. C., Meunier, L. D., Thiem, P. A., & Sellers, T. S. (1989). Use of danazol for treatment of corticosteroid-resistant immune-mediated thrombocytopenia in a dog. *Journal of the American Veterinary Medical Association*, 194(1), 76–78.
21. Bodié, K., Gagne, G. D., Sramek, M. K., Desmond, D. J., Abel, S. J., & Fagerland, J. A. (2011). Asymptomatic Macrothrombocytopenia in a Young Pure-Bred Beagle Dog: A Case Report. *Toxicologic Pathology*, 39(6), 980–987. <https://doi.org/10.1177/0192623311416261>
22. Botsch, V., Küchenhoff, H., Hartmann, K., & Hirschberger, J. (2009). Retrospective study of 871 dogs with thrombocytopenia. *Veterinary Record*, 164(21), 647–651. <https://doi.org/10.1136/vr.164.21.647>
23. Bourguignon, C., Béguin, J., & Benckekroun, G. (2017). Immune-mediated thrombocytopenia in a dog. *Point Vétérinaire*, 48(373), 48–54.
24. Breitschwerdt, E. B., Blann, K. R., Stebbins, M. E., Muñana, K. R., Davidson, M. G., Jackson, H. A., & Willard, M. D. (2004). Clinicopathological Abnormalities and Treatment Response in 24 Dogs

- Seroreactive to *Bartonella vinsonii* (berkhoffii) Antigens. *Journal of the American Animal Hospital Association*, 40(2), 92–101. <https://doi.org/10.5326/0400092>
25. Bulman-Fleming, J. C., Gibson, T. W., & Kruth, S. A. (2009). Invasive cutaneous angiomatosis and thrombocytopenia in a cat. *Journal of the American Veterinary Medical Association*, 234(3), 381–384. <https://doi.org/10.2460/javma.234.3.381>
  26. Busse, L., & Mischke, R. (1998). Megakaryopoiesis in bone marrow of dogs with autoimmune-induced thrombocytopenia and *Ehrlichia canis* infection. *Tierärztliche Umschau*, 53(12), 703–708.
  27. Busta, I., Xie, H., & Kim, M.-S. (2009). The Use of Gui-Pi-Tang in Small Animals with Immune-Mediated Blood Disorders. *Journal of Veterinary Clinics*, 26(2), 181–184.
  28. Cain, G. R., Cain, J. L., Turrel, J. M., Theilen, G., & Jain, N. C. (1988). Immune-mediated Hemolytic Anemia and Thrombocytopenia in a Cat after Bone Marrow Transplantation. *Veterinary Pathology*, 25(2), 161–162. <https://doi.org/10.1177/030098588802500209>
  29. Cain, G. R., Champlin, R., & Jain, N. (1989). Immune thrombocytopenia in dogs after fetal liver hematopoietic cell transplantation. *Experimental Hematology*, 17(3), 287–291.
  30. Callan, M. B., Werner, P., Mason, N. J., Meny, G. M., Raducha, M. G., & Henthorn, P. S. (2013). Polymorphisms in Canine Platelet Glycoproteins Identify Potential Platelet Antigens. *Comparative Medicine*, 63(4), 348–354.
  31. Campbell, K. L., George, J. W., & Greene, C. E. (1984). Application of the enzyme-linked immunosorbent assay for the detection of platelet antibodies in dogs. *American Journal of Veterinary Research*, 45(12), 2561–2564.
  32. Carr, A. P., Panciera, D. L., & Kidd, L. (2002). Prognostic Factors for Mortality and Thromboembolism in Canine Immune-Mediated Hemolytic Anemia: A Retrospective Study of 72 Dogs. *Journal of Veterinary Internal Medicine*, 16(5), 504–509. <https://doi.org/10.1111/j.1939-1676.2002.tb02378.x>
  33. ChangWoo, L., Jeong, N. K., JungSik, L., & JeongWook, S. (1996). Systemic lupus erythematosus in a dog, suspected systemic lupus erythematosus in a dog, and autoimmune thrombocytopenic purpura hemorrhagica in a dog. *Korean Journal of Veterinary Clinical Medicine*, 13(1), 81–86.
  34. Chen, Y.-C., Chi, L.-M., Chow, K.-C., Chiou, S.-H., Fan, Y.-H., Ho, S.-P., Hsu, Y.-C., Hwang, Y.-C., Wu, M.-X., Lee, W.-M., Lin, S.-L., Tsang, C.-L., & Mao, F. C. (2016). Association of anticardiolipin, antiphosphatidylserine, anti- $\beta$ 2 glycoprotein I, and antiphosphatidylcholine autoantibodies with canine immune thrombocytopenia. *BMC Veterinary Research*, 12(1), 106. <https://doi.org/10.1186/s12917-016-0727-3>
  35. Chethan, G. E., Thakur, N., Madhesh, E., Garkhal, J., Mahendran, K., De, U. K., & Dixit, S. K. (2016). Therapeutic management of *Ehrlichia canis* induced pancytopenia and hepatopathy in a dog. *Journal of Veterinary Parasitology*, 30(1), 28–31.

36. Chirek, A., Silaghi, C., Pfister, K., & Kohn, B. (2018). Granulocytic anaplasmosis in 63 dogs: Clinical signs, laboratory results, therapy and course of disease: Canine granulocytic anaplasmosis. *Journal of Small Animal Practice*, 59(2), 112–120. <https://doi.org/10.1111/jsap.12787>
37. Clark, H. C., Childress, R. D., & Coleman, N. C. (1980). Idiopathic thrombocytopenic purpura: A review and case report. *Veterinary Medicine Small Animal Clinician*, 75(3), 427–430.
38. Codner, E. C., Roberts, R. E., & Ainsworth, A. G. (1985). Atypical findings in 16 cases of canine ehrlichiosis. *Journal of the American Veterinary Medical Association*, 186(2), 166–169.
39. Çolakoğlu, E. Ç., & Haydardedeoğlu, A. E. (2019). Thrombocyte indices and plateletcrit in dogs with primary immune-mediated hemolytic anemia. *Medycyna Weterynaryjna*, 75(8), 484–486. <https://doi.org/10.21521/mw.6262>
40. Collicutt, N. B., & Garner, B. (2013). Erythrocyte dysplasia in peripheral blood smears from 5 thrombocytopenic dogs treated with vincristine sulfate. *Veterinary Clinical Pathology*, 42(4), 458–464. <https://doi.org/10.1111/vcp.12089>
41. Cooper, S. A., Huang, A. A., Raskin, R. E., Weng, H.-Y., & Scott-Moncrieff, J. C. (2016). Clinical data, clinicopathologic findings and outcome in dogs with amegakaryocytic thrombocytopenia and primary immune-mediated thrombocytopenia: Amegakaryocytic thrombocytopenia. *Journal of Small Animal Practice*, 57(3), 142–147. <https://doi.org/10.1111/jsap.12441>
42. Cortese, L., Pelagalli, A., Piantedosi, D., Cestaro, A., Di Loria, A., Lombardi, P., Avallone, L., & Ciaramella, P. (2009). Effects of therapy on haemostasis in dogs infected with *Leishmania infantum*, *Ehrlichia canis*, or both combined. *Veterinary Record*, 164(14), 433–434. <https://doi.org/10.1136/vr.164.14.433>
43. Cortese, L., Piantedosi, D., Ciaramella, P., Pero, M. E., Sica, M., Ruggiero, G., Terrazzano, G., & Mastellone, V. (2009). Secondary immune-mediated thrombocytopenia in dogs naturally infected by *Leishmania infantum*. *Veterinary Record*, 164(25), 778–782. <https://doi.org/10.1136/vr.164.25.778>
44. Cortese, L., Terrazzano, G., Piantedosi, D., Sica, M., Prisco, M., Ruggiero, G., & Ciaramella, P. (2011). Prevalence of anti-platelet antibodies in dogs naturally co-infected by *Leishmania infantum* and *Ehrlichia canis*. *The Veterinary Journal*, 188(1), 118–121. <https://doi.org/10.1016/j.tvjl.2010.03.015>
45. Cummings, F. O., & Rizzo, S. A. (2017). Treatment of presumptive primary immune-mediated thrombocytopenia with mycophenolate mofetil versus cyclosporine in dogs: Treatment of immune-mediated thrombocytopenia dogs. *Journal of Small Animal Practice*, 58(2), 96–102. <https://doi.org/10.1111/jsap.12621>
46. Cuq, B., Blois, S. L., & Mathews, K. A. (2017). Anti-thymocyte serum as part of an immunosuppressive regimen in treating haematological immune-mediated diseases in dogs: RADTS in canine immune-mediated diseases. *Journal of Small Animal Practice*, 58(6), 348–354. <https://doi.org/10.1111/jsap.12666>
47. Davidow, E. B., Brainard, B., Martin, L. G., Beal, M. W., Bode, A., Ford, M. J., Ramsey, N., Fagella, A., & Jutkowitz, A. (2012). Use of fresh platelet concentrate or lyophilized platelets in thrombocytopenic dogs with clinical signs of hemorrhage: A preliminary trial in 37 dogs: Lyophilized platelets in bleeding

thrombocytopenic dogs. *Journal of Veterinary Emergency and Critical Care*, 22(1), 116–125.

<https://doi.org/10.1111/j.1476-4431.2011.00710.x>

48. Davis, W. M. (1984). Hapten-induced, immune-mediated thrombocytopenia in a dog. *Journal of the American Veterinary Medical Association*, 184(8), 976–977.
49. Day, M. J. (1996). Serial monitoring of clinical, haematological and immunological parameters in canine autoimmune haemolytic anaemia. *Journal of Small Animal Practice*, 37(11), 523–534.  
<https://doi.org/10.1111/j.1748-5827.1996.tb02313.x>
50. Day, M. J., & Penhale, W. J. (1992). Immune-mediated disease in the old English sheepdog. *Research in Veterinary Science*, 53(1), 87–92. [https://doi.org/10.1016/0034-5288\(92\)90090-O](https://doi.org/10.1016/0034-5288(92)90090-O)
51. Dircks, B. H., Schuberth, H.-J., & Mischke, R. (2009). Underlying diseases and clinicopathologic variables of thrombocytopenic dogs with and without platelet-bound antibodies detected by use of a flow cytometric assay: 83 cases (2004–2006). *Journal of the American Veterinary Medical Association*, 235(8), 960–966. <https://doi.org/10.2460/javma.235.8.960>
52. Dircks, B., Schuberth, H. J., & Mischke, R. (2011). Klinische und labordiagnostische Parameter bei 21 Hunden mit primärer immunvermittelter Thrombozytopenie. *Tierärztliche Praxis Ausgabe K: Kleintiere / Heimtiere*, 39(K), 17–24. <https://doi.org/10.1055/s-0037-1622569>
53. Dorrestein, E., Peda, A., Thrall, M. A., & Illanes, O. (2019). Fatal pulmonary thromboembolism in a two-year-old dog receiving long-term corticosteroid therapy. *Veterinary Record Case Reports*, 7(2).  
<https://doi.org/10.1136/vetreccr-2018-000701>
54. Duval, D., & Giger, U. (1996). Vaccine-Associated Immune-Mediated Hemolytic Anemia in the Dog. *Journal of Veterinary Internal Medicine*, 10(5), 290–295. <https://doi.org/10.1111/j.1939-1676.1996.tb02064.x>
55. Ellis, J., Bell, R., Barnes, D. C., & Miller, R. (2018). Prevalence and disease associations in feline thrombocytopenia: A retrospective study of 194 cases: Thrombocytopenia in cats. *Journal of Small Animal Practice*, 59(9), 531–538. <https://doi.org/10.1111/jsap.12814>
56. Enders, A., van der Woerdt, A., & Donovan, T. (2017). Endogenous mycotic endophthalmitis in a dog with candiduria and Evans syndrome. *Veterinary Ophthalmology*, 20(1), 84–88.  
<https://doi.org/10.1111/vop.12373>
57. Engelbrecht, R., Kohn, B., Leibold, W., & Giger, U. (2002). Clinical findings, diagnosis and treatment results in primary and secondary immune-mediated haemolytic anaemia in dogs. *Kleintierpraxis*, 47(5), 265–278.
58. Espadale, E., Buckley, L., Borio, S., McEwan, N., & Schmidt, V. (2018). Successful multimodal treatment of *Paecilomyces lilacinus* infection in a dog. *Veterinary Record Case Reports*, 6(2).  
<https://doi.org/10.1136/vetreccr-2018-000627>

59. Fathi, E., & Jamshidi, S. (2014). Follow-up, diagnosis, clinical evidence, laboratory evaluation, and treatment of Idiopathic thrombocytopenia using human Intravenous Immunglobulin in a terrier dog. *Iranian Journal of Veterinary Science and Technology*, 6(1), 64–70.
60. Feldman, B. F. (1996). Demographics of canine immune-mediated haemolytic anaemia in the Southeastern United States. *Comparative Haematology International*, 6(1), 42–45.  
<https://doi.org/10.1007/BF00368101>
61. Feldman, B. F., Handagama, P., & Lubberink, A. A. (1985). Splenectomy as adjunctive therapy for immune-mediated thrombocytopenia and hemolytic anemia in the dog. *Journal of the American Veterinary Medical Association*, 187(6), 617–619.
62. Feldman, B. F., Thomason, K. J., & Jain, N. C. (1988). Immune-mediated thrombocytopenia in a dog. *Veterinary Clinics of North America: Small Animal Practice*, 18(1), 255–276.  
[https://doi.org/10.1016/S0195-5616\(88\)50020-7](https://doi.org/10.1016/S0195-5616(88)50020-7)
63. França, R. T., Pillat, M. M., da Silva, C. B., Schafer, A. S., Dornelles, G. L., Costa, M. M., Chaves, R. O., de Andrade, C. M., Erhardt, M. M., Antoziazzi, A. Q., Ulrich, H., da Silva, A. S., & Lopes, S. T. dos A. (2018). Surface immunoglobulins of erythrocytes and platelets in dogs naturally infected by *Rangelia vitalii*. *Microbial Pathogenesis*, 121, 245–251. <https://doi.org/10.1016/j.micpath.2018.05.036>
64. Francey, T., Etter, M., & Schweighauser, A. (2021). Evaluation of membrane-based therapeutic plasma exchange as adjunctive treatment for immune-mediated hematologic disorders in dogs. *Journal of Veterinary Internal Medicine*, 35(2), 925–935. <https://doi.org/10.1111/jvim.16049>
65. Friedenbergs, S. G., Buhrman, G., Chdid, L., Olby, N. J., Olivry, T., Guillaumin, J., O'Toole, T., Goggs, R., Kennedy, L. J., Rose, R. B., & Meurs, K. M. (2016). Evaluation of a DLA-79 allele associated with multiple immune-mediated diseases in dogs. *Immunogenetics*, 68(3), 205–217. <https://doi.org/10.1007/s00251-015-0894-6>
66. Garon, C., Scott, M., Selting, K., & Cohn, L. (1999). Idiopathic thrombocytopenic purpura in a cat. *Journal of the American Animal Hospital Association*, 35(6), 464–470. <https://doi.org/10.5326/15473317-35-6-464>
67. Gaschen, F. P., Meyer, B. S., & Harvey, J. W. (1992). Amegakaryocytic thrombocytopenia and immune-mediated haemolytic anaemia in a cat. *Comparative Haematology International*, 2(3), 175–178.  
<https://doi.org/10.1007/BF00426174>
68. Gaunt, S., Beall, M., Stillman, B., Lorentzen, L., Diniz, P., Chandrashekar, R., & Breitschwerdt, E. (2010). Experimental infection and co-infection of dogs with *Anaplasma platys* and *Ehrlichia canis*: Hematologic, serologic and molecular findings. *Parasites & Vectors*, 3(33). <https://doi.org/10.1186/1756-3305-3-33>
69. Giannuzzi, A. P., De Simone, A., Ricciardi, M., & Gernone, F. (2014). Presumptive Ischemic Brain Infarction in a Dog with Evans' Syndrome. *Case Reports in Veterinary Medicine*, 2014, 1–8.  
<https://doi.org/10.1155/2014/456524>

70. Goddard, A., Leisewitz, A. L., Kristensen, A. T., & Schoeman, J. P. (2015). Platelet activation and platelet-leukocyte interaction in dogs naturally infected with *Babesia rossi*. *The Veterinary Journal*, 205(3), 387–392. <https://doi.org/10.1016/j.tvjl.2015.05.008>
71. Goggs, R., Boag, A. K., & Chan, D. L. (2008). Concurrent immune-mediated haemolytic anaemia and severe thrombocytopenia in 21 dogs. *Veterinary Record*, 163(11), 323–327. <https://doi.org/10.1136/vr.163.11.323>
72. Goggs, R., Brainard, B. M., LeVine, D. N., Calabro, J., Harrell, K., Mills, T., Stone, R., Davidson, B., Iacovetta, C., Harris, L., Gicking, J., Aslanian, M., Ziegler, A., Fulcher, B., Lightfoot, T., Miller, M., Loftus, J., Walton, R., Blong, A., Kishbaugh, J., Hale, A. S. (2020). Lyophilized platelets versus cryopreserved platelets for management of bleeding in thrombocytopenic dogs: A multicenter randomized clinical trial. *Journal of Veterinary Internal Medicine*, 34(6), 2384–2397. <https://doi.org/10.1111/jvim.15922>
73. Gonde, S. (2017). Clinico-haemato-biochemical changes in naturally occurring canine babesiosis in Punjab, India. *Malaysian Journal of Veterinary Research*, 8(1), 37–44.
74. Goodman, R. A., & Breitschwerdt, E. B. (2005). Clinicopathologic findings in dogs seroreactive to *Bartonella henselae* antigens. *American Journal of Veterinary Research*, 66(12), 2060–2064. <https://doi.org/10.2460/ajvr.2005.66.2060>
75. Gould, S. M., & McInnes, E. L. (1999). Immune-mediated thrombocytopenia associated with *Angiostrongylus vasorum* infection in a dog. *Journal of Small Animal Practice*, 40(5), 227–232. <https://doi.org/10.1111/j.1748-5827.1999.tb03068.x>
76. Gowing, G. M. (1964). Idiopathic Thrombocytopenic Purpura in the Dog. *Journal of the American Veterinary Medical Association*, 145, 987–990.
77. Greene, C. E., Scoggin, J., Thomas, J. E., & Barsanti, J. A. (1982). Vincristine in the treatment of thrombocytopenia in five dogs. *Journal of the American Veterinary Medical Association*, 180(2), 140–143.
78. Greisen, A. (2008). Leishmania as a cause of Evans syndrome in a Greek street dog. *Dansk Veterinartidsskrift*, 91(5), 8–11.
79. Grindem, C. B., Breitschwerdt, E. B., Corbett, W. T., & Jans, H. E. (1991). Epidemiologic Survey of Thrombocytopenia in Dogs: A Report on 987 Cases. *Veterinary Clinical Pathology*, 20(2), 38–43. <https://doi.org/10.1111/j.1939-165X.1991.tb00566.x>
80. Grindem, C., Breitschwerdt, E., Perkins, P., Cullins, L., Thomas, T., & Hegarty, B. (1999). Platelet-associated immunoglobulin (antiplatelet antibody) in canine Rocky Mountain spotted fever and ehrlichiosis. *Journal of the American Animal Hospital Association*, 35(1), 56–61. <https://doi.org/10.5326/15473317-35-1-56>
81. Grobman, M., Outi, H., Rindt, H., & Reiner, C. (2017). Serum Thymidine Kinase 1, Canine-C-Reactive Protein, Haptoglobin, and Vitamin D Concentrations in Dogs with Immune-Mediated Hemolytic Anemia, Thrombocytopenia, and Polyarthropathy. *Journal of Veterinary Internal Medicine*, 31(5), 1430–1440. <https://doi.org/10.1111/jvim.14787>

82. Guevar, J., Gutierrez-Quintana, R., Leach, J. D. G., & Penderis, J. (2015). What Is Your Neurologic Diagnosis? Suspected immune-mediated thrombocytopenia with secondary spinal cord hemorrhage. *Journal of the American Veterinary Medical Association*, 247(5), 479–482.  
<https://doi.org/10.2460/javma.247.5.479>
83. Halmai, D., Sótonyi, P., Vajdovich, P., & Gaál, T. (2005). Morphological evaluation of canine platelets on Giemsa- and PAS-stained blood smears. *Acta Veterinaria Hungarica*, 53(3), 337–350.  
<https://doi.org/10.1556/avet.53.2005.3.7>
84. Hanahachi, A., Kano, R., Watari, T., & Hasegawa, A. (2002). Thiazole orange-positive platelets in a dog with idiopathic thrombocytopenic purpura. *Veterinary Record*, 150(2), 48–49.  
<https://doi.org/10.1136/vr.150.2.48>
85. Hanzlíček, D., & Bürglová, A. (2012). Non-regenerative immune-mediated haemolytic anaemia in dogs—A description of three cases treated with human immunoglobulin. *Veterinářství*, 62, 343–347.
86. Harrus, S., Day, M. J., Waner, T., & Bark, H. (2001). Presence of immune-complexes, and absence of antinuclear antibodies, in sera of dogs naturally and experimentally infected with *Ehrlichia canis*. *Veterinary Microbiology*, 83(4), 343–349. [https://doi.org/10.1016/S0378-1135\(01\)00431-X](https://doi.org/10.1016/S0378-1135(01)00431-X)
87. Harrus, S., Waner, T., Eldor, A., Zwang, E., & Bark, H. (1996). Platelet dysfunction associated with experimental acute canine ehrlichiosis. *Veterinary Record*, 139(12), 290–293.  
<https://doi.org/10.1136/vr.139.12.290>
88. Harrus, S., Waner, T., Keysary, A., Aroch, I., Voet, H., & Bark, H. (1998). Investigation of splenic functions in canine monocytic ehrlichiosis. *Veterinary Immunology and Immunopathology*, 62(1), 15–27.  
[https://doi.org/10.1016/S0165-2427\(97\)00127-X](https://doi.org/10.1016/S0165-2427(97)00127-X)
89. Harrus, S., Waner, T., Weiss, D. J., Keysary, A., & Bark, H. (1996). Kinetics of serum antiplatelet antibodies in experimental acute canine ehrlichiosis. *Veterinary Immunology and Immunopathology*, 51(1–2), 13–20. [https://doi.org/10.1016/0165-2427\(95\)05516-9](https://doi.org/10.1016/0165-2427(95)05516-9)
90. Heinchen, C., & Maurer, M. (1995). Autoimmune thrombocytopenia in a dog. *Praktische Tierarzt*, 76(6), 558–559.
91. Helfand, S. (1988). Neoplasia and immune-mediated thrombocytopenia. *Veterinary Clinics of North America: Small Animal Practice*, 18(1), 255–276. [https://doi.org/10.1016/S0195-5616\(88\)50020-7](https://doi.org/10.1016/S0195-5616(88)50020-7)
92. Helfand, S. C., Couto, C. G., & Madewell, B. R. (1985). Immune-mediated thrombocytopenia associated with solid tumors in dogs. *Journal of the American Animal Hospital Association (USA)*, 21(6), 787–794.
93. Helfand, S. C., Jain, N. C., & Paul, M. (1984). Vincristine-loaded platelet therapy for idiopathic thrombocytopenia in a dog. *Journal of the American Veterinary Medical Association*, 185(2), 224–226.
94. Herrera, M. A., Burkitt, J. M., Epstein, S. E., Jones, M. E. B., Moore, P. F., & Sykes, J. E. (2009). *Ralstonia pickettii* Septicemia in a Dog with Immune-Mediated Thrombocytopenia. *Journal of Veterinary Internal Medicine*, 23(1), 182–185. <https://doi.org/10.1111/j.1939-1676.2008.0222.x>



95. Hisasue, M., Hukunaga, D., Akaike, K., Ishikawa, T., Saito, M., Tsuchiya, R., & Yamada, T. (2008). A canine case of idiopathic thrombocytopenic purpura successfully treated by intravenous immunoglobulin therapy and splenectomy. *Journal of the Japan Veterinary Medical Association (Japan)*, 61(3), 223–226.
96. Hitoshi, A., Miho, F., & Hiromu, K. (2014). Case of Feline Idiopathic Immune-mediated Thrombocytopenia Effectively Treated with Cyclophosphamide after Splenectomy. *Journal of the Japan Veterinary Medical Association*, 67(4), 269–273.
97. Hsu, K., Snead, E., Davies, J., & Carr, A. (2012). Iatrogenic Hyperadrenocorticism, Calcinosis Cutis, and Myocardial Infarction in a Dog Treated for IMT. *Journal of the American Animal Hospital Association*, 48(3), 209–215. <https://doi.org/10.5326/JAAHA-MS-5740>
98. Huang, A. A., Moore, G. E., & Scott-Moncrieff, J. C. (2012). Idiopathic Immune-Mediated Thrombocytopenia and Recent Vaccination in Dogs. *Journal of Veterinary Internal Medicine*, 26(1), 142–148. <https://doi.org/10.1111/j.1939-1676.2011.00850.x>
99. Inokuma, H., Okuda, M., Yoshizaki, Y., Hiraoka, H., Miyama, T., Itamoto, K., Une, S., Nakaichi, M., & Taura, Y. (2005). Clinical observations of *Babesia gibsoni* infection with low parasitaemia confirmed by PCR in dogs. *Veterinary Record*, 156(4), 116–118. <https://doi.org/10.1136/vr.156.4.116>
100. Jackson, M. L., & Kruth, S. A. (1985). Immune-mediated Hemolytic Anemia and Thrombocytopenia in the Dog: A retrospective study of 55 cases diagnosed from 1969 through 1983 at the Western College of Veterinary Medicine. *Canadian Veterinary Journal*, 26(8), 245–250.
101. Jaffey, J., DeClue, A., Cannon, A., Tocci, L., & Hyland, J. (2019). Presumptive Glucocorticoid-Induced Refractory Hypocalcemia in a Dog with Idiopathic Immune-Mediated Hypoparathyroidism, Thrombocytopenia, and Hemolytic Anemia. *Journal of the American Animal Hospital Association*, 55(1), e551-04. <https://doi.org/10.5326/JAAHA-MS-6705>
102. Jain, N. C., & Kono, C. S. (1980). The Platelet Factor- 3 Test for Detection of Canine Antiplatelet Antibody. *Veterinary Clinical Pathology*, 9(1), 10–14. <https://doi.org/10.1111/j.1939-165X.1980.tb00886.x>
103. Jain, N. C., & Switzer, J. W. (1981). Autoimmune Thrombocytopenia in Dogs and Cats. *Veterinary Clinics of North America: Small Animal Practice*, 11(2), 421–434. [https://doi.org/10.1016/S0195-5616\(81\)50037-4](https://doi.org/10.1016/S0195-5616(81)50037-4)
104. Jans, H. E., Armstrong, P. J., & Price, G. S. (1990). Therapy of Immune Mediated Thrombocytopenia. *Journal of Veterinary Internal Medicine*, 4(1), 4–7. <https://doi.org/10.1111/j.1939-1676.1990.tb00867.x>
105. Jayarajan, A., Pillal, U. N., Ben, A. E., & Alex, P. C. (2011). Evans' syndrome in a German Shepherd Dog. *Indian Veterinary Journal*, 88(10), 123–124.
106. Jeffery, U. (2017). Urban environment: A risk factor for canine immune-mediated disease? *Journal of Small Animal Practice*, 58(11), 639–644. <https://doi.org/10.1111/jsap.12724>
107. Joshi, B. C., & Jain, N. C. (1976). Detection of antiplatelet antibody in serum and on megakaryocytes of dogs with autoimmune thrombocytopenia. *American Journal of Veterinary Research*, 37(6), 681–685.

108. Joshi, B. C., & Jain, N. C. (1977). Experimental immunologic thrombocytopenia in dogs: A study of thrombocytopenia and megakaryocytopoiesis. *Research in Veterinary Science*, 22(1), 11–17.
109. Joshi, B. C., Raplee, R. G., Powell, A. L., & Hancock, F. (1979). Autoimmune thrombocytopenia in a cat. *Journal of the American Animal Hospital Association*, 15(5), 585–588.
110. Kang, M.-H., Heo, R.-Y., & Park, H.-M. (2016). Evaluation of D-Dimer Concentrations in Clinically Ill Dogs with High Risk of Thromboembolic Disease. *Pakistan Veterinary Journal*, 36(2), 219–223.
111. Kawarai, S., Hisasue, M., Matsuura, S., Ito, T., Inoue, Y., Neo, S., Fujii, Y., Madarame, H., Shirota, K., & Tsuchiya, R. (2015). Canine Pemphigus Foliaceus with Concurrent Immune-Mediated Thrombocytopenia. *Journal of the American Animal Hospital Association*, 51(1), 56–63.  
<https://doi.org/10.5326/JAAHA-MS-6044>
112. Keller, E. T. (1992). Immune-mediated disease as a risk factor for canine lymphoma. *Cancer*, 70(9), 2334–2337. [https://doi.org/10.1002/1097-0142\(19921101\)70:9<2334::AID-CNCR2820700920>3.0.CO;2-7](https://doi.org/10.1002/1097-0142(19921101)70:9<2334::AID-CNCR2820700920>3.0.CO;2-7)
113. Kim, S. M., Kim, G. N., Jeong, S. W., & Kim, J. H. (2020). Multiple splenic infarctions in a dog with immune-mediated hemolytic anemia: Therapeutic implications. *Iranian Journal of Veterinary Research*, 21(1), 65–69.
114. Kim, S.-L., Cho, C.-S., Kim, M.-J., Kang, T.-Y., Lee, J.-M., Park, H. J., Cheong, J., Lee, K.-K., & Yun, Y.-M. (2007). A case of idiopathic thrombocytopenia in a Yorkshire terrier dog. *Korean Journal of Veterinary Research*, 47(4), 475–478.
115. Klag, A. R., Giger, U., & Shofer, F. S. (1993). Idiopathic immune-mediated hemolytic anemia in dogs: 42 cases (1986-1990). *Journal of the American Veterinary Medical Association*, 202(5), 783–788.
116. Kohn, B., Bal, G., Chirek, A., Rehbein, S., & Salama, A. (2016a). Erratum to: Treatment of 5 dogs with immune-mediated thrombocytopenia using romiplostim. *BMC Veterinary Research*, 12(1), 290.  
<https://doi.org/10.1186/s12917-016-0787-4>
117. Kohn, B., Bal, G., Chirek, A., Rehbein, S., & Salama, A. (2016b). Treatment of 5 dogs with immune-mediated thrombocytopenia using Romiplostim. *BMC Veterinary Research*, 12(1), 96.  
<https://doi.org/10.1186/s12917-016-0718-4>
118. Kohn, B., Engelbrecht, R., Leibold, W., & Giger, U. (2000). Clinical findings, diagnostics and treatment results in primary and secondary immune-mediated thrombocytopenia in the dog [Klinische Befunde, Diagnostik und Behandlungserfolge bei der primären und sekundären immunbedingten Thrombozytopenie beim Hund]. *Kleintierpraxis*, 45(12), 893–907.
119. Kohn, B., Galke, D., Beelitz, P., & Pfister, K. (2008). Clinical Features of Canine Granulocytic Anaplasmosis in 18 Naturally Infected Dogs. *Journal of Veterinary Internal Medicine*, 22(6), 1289–1295.  
<https://doi.org/10.1111/j.1939-1676.2008.0180.x>

120. Kohn, B., Linden, T., & Leibold, W. (2006). Platelet-bound antibodies detected by a flow cytometric assay in cats with thrombocytopenia. *Journal of Feline Medicine and Surgery*, 8(4), 254–260. <https://doi.org/10.1016/j.jfms.2006.01.006>
121. Kopecny, L., Palm, C. A., Naylor, S., Kirby, J., & Cowgill, L. D. (2020). Application of therapeutic plasma exchange in dogs with immune-mediated thrombocytopenia. *Journal of Veterinary Internal Medicine*, 34(4), 1576–1581. <https://doi.org/10.1111/jvim.15836>
122. Kristensen, A. T., Weiss, D. J., & Klausner, J. S. (1994). Platelet Dysfunction Associated With Immune-Mediated Thrombocytopenia in Dogs. *Journal of Veterinary Internal Medicine*, 8(5), 323–327. <https://doi.org/10.1111/j.1939-1676.1994.tb03244.x>
123. Kristensen, A. T., Weiss, D. J., Klausner, J. S., Laber, J., & Christie, D. J. (1994a). Detection of Antiplatelet Antibody With a Platelet Immunofluorescence Assay. *Journal of Veterinary Internal Medicine*, 8(1), 36–39. <https://doi.org/10.1111/j.1939-1676.1994.tb03193.x>
124. Kristensen, A. T., Weiss, D. J., Klausner, J. S., Laber, J., & Christie, D. J. (1994b). Comparison of microscopic and flow cytometric detection of platelet antibody in dogs suspected of having immune-mediated thrombocytopenia. *American Journal of Veterinary Research*, 55(8), 1111–1114.
125. Lachowicz, J. L., Post, G. S., Moroff, S. D., & Mooney, S. C. (2004). Acquired amegakaryocytic thrombocytopenia—Four cases and a literature review. *Journal of Small Animal Practice*, 45(10), 507–514. <https://doi.org/10.1111/j.1748-5827.2004.tb00197.x>
126. Laing, E. J., Miller, C. W., & Cochrane, S. M. (1988). Treatment of cyclophosphamide-induced hemorrhagic cystitis in five dogs. *Journal of the American Veterinary Medical Association*, 193(2), 233–236.
127. Langhorn, R., Bochsén, L., Willesen, J. L., Sørensen, T. M., & Kristensen, A. T. (2019). Thromboelastography-guided transfusion in dogs with hypocoagulable disorders: A case series. *Acta Veterinaria Scandinavica*, 61(1), 35–42. <https://doi.org/10.1186/s13028-019-0469-x>
128. LaQuaglia, K. A., Robertson, J. B., & Lunn, K. F. (2021). Neutropenia in dogs receiving vincristine for treatment of presumptive immune-mediated thrombocytopenia. *Journal of Veterinary Internal Medicine*, 35(1), 226–233. <https://doi.org/10.1111/jvim.16029>
129. Larkin, H. A., Collins, J. D., & Lambert, N. H. (1972). A fatal case of idiopathic thrombocytopenic purpura in a dog. *Irish Veterinary Journal*, 26(2), 25–28.
130. Laurenson, M. P., Hopper, K., Herrera, M. A., & Johnson, E. G. (2010). Concurrent Diseases and Conditions in Dogs with Splenic Vein Thrombosis: Splenic Vein Thrombosis in Dogs. *Journal of Veterinary Internal Medicine*, 24(6), 1298–1304. <https://doi.org/10.1111/j.1939-1676.2010.0593.x>
131. Lavergne, S. N., & Trepanier, L. A. (2007). Anti-platelet antibodies in a natural animal model of sulphonamide-associated thrombocytopenia. *Platelets*, 18(8), 595–604. <https://doi.org/10.1080/09537100701392913>

132. Ledbetter, E. C., Riis, R. C., Kern, T. J., Haley, N. J., & Schatzberg, S. J. (2006). Corneal ulceration associated with naturally occurring canine herpesvirus-1 infection in two adult dogs. *Journal of the American Veterinary Medical Association*, 229(3), 376–384. <https://doi.org/10.2460/javma.229.3.376>
133. Lee, J. S., Bellis, T. J., Yoskowitz, A. S., & Levitin, B. (2019). Acute onset tetraplegia associated with immune-mediated thrombocytopenia and suspected secondary intraspinal hemorrhage in a dog. *Clinical Case Reports*, 7(9), 1673–1679. <https://doi.org/10.1002/ccr3.2295>
134. LeVine, D. N., Birkenheuer, A. J., Brooks, M. B., Nordone, S. K., Bellinger, D. A., Jones, S. L., Fischer, T. H., Oglesbee, S. E., Frey, K., Brinson, N. S., Peters, A. P., Marr, H. S., Motsinger-Reif, A., Gudbrandsdottir, S., Bussel, J. B., & Key, N. S. (2014). A novel canine model of immune thrombocytopenia: Has immune thrombocytopenia (ITP) gone to the dogs? *British Journal of Haematology*, 167(1), 110–120. <https://doi.org/10.1111/bjh.13005>
135. LeVine, D. N., Cianciolo, R. E., Linder, K. E., Bizikova, P., Birkenheuer, A. J., Brooks, M. B., Salous, A. K., Nordone, S. K., Bellinger, D. A., Marr, H., Jones, S. L., Fischer, T. H., Deng, Y., Mazepa, M., & Key, N. S. (2019). Endothelial alterations in a canine model of immune thrombocytopenia. *Platelets*, 30(1), 88–97. <https://doi.org/10.1080/09537104.2017.1378807>
136. Lewis, D. C., McVey, D. S., Shuman, W. S., & Muller, W. B. (1995). Development and characterization of a flow cytometric assay for detection of platelet-bound immunoglobulin G in dogs. *American Journal of Veterinary Research*, 56(12), 1555–1558.
137. Lewis, D. C., & Meyers, K. M. (1994). Effect of anticoagulant and blood storage time on platelet-bound antibody concentrations in clinically normal dogs. *American Journal of Veterinary Research*, 55(5), 602–605.
138. Lewis, D. C., & Meyers, K. M. (1996a). Studies of platelet-bound and serum platelet-bindable immunoglobulins in dogs with idiopathic thrombocytopenic purpura. *Experimental Hematology*, 24(6), 696–701.
139. Lewis, D. C., & Meyers, K. M. (1996b). Canine Idiopathic Thrombocytopenic Purpura. *Journal of Veterinary Internal Medicine*, 10(4), 207–218. <https://doi.org/10.1111/j.1939-1676.1996.tb02052.x>
140. Lewis, D. C., Meyers, K. M., Callan, M. B., Bücheler, J., & Giger, U. (1995). Detection of platelet-bound and serum platelet-bindable antibodies for diagnosis of idiopathic thrombocytopenic purpura in dogs. *Journal of the American Veterinary Medical Association*, 206(1), 47–52.
141. Lewis, R. M., Schwartz, R., & Henry, W. B. (1965). Canine systemic lupus erythematosus. *Blood*, 25(2), 143–160. <https://doi.org/10.1182/blood.V25.2.143.143>
142. Lo Piccolo, F., Busch, K., Palić, J., Geisen, V., Hartmann, K., & Unterer, S. (2019). Toxoplasma gondii-associated cholecystitis in a cat receiving immunosuppressive treatment. *Tierärztliche Praxis Ausgabe K: Kleintiere / Heimtiere*, 47, 453–457. <https://doi.org/10.1055/a-1020-3775>
143. Mackin, A. J., Allen, D. G., & Johnston, I. B. (1995). Effects of vincristine and prednisone on platelet numbers and function in clinically normal dogs. *American Journal of Veterinary Research*, 56(1), 100–108.

144. Magaña, A., Sánchez, F., Villa, K., Rivera, L., & Morales, E. (2015). Systemic neosporosis in a dog treated for immune-mediated thrombocytopenia and hemolytic anemia. *Veterinary Clinical Pathology*, 44(4), 592–596. <https://doi.org/10.1111/vcp.12287>
145. Magne, M. L. (1996). Selective IgA deficiency in German Shepherd dogs. *Journal of Veterinary Allergy and Clinical Immunology*, 4(1), 23–24.
146. Magrane, H. J., Magrane, W. G., & Ross, J. R. (1959). Idiopathic thrombocytopenic purpura in a dog—a case report. *Journal of the American Veterinary Medical Association*, 135, 520–522.
147. Makielski, K. M., Brooks, M. B., Wang, C., Cullen, J. N., O'Connor, A. M., & LeVine, D. N. (2018). Development and implementation of a novel immune thrombocytopenia bleeding score for dogs. *Journal of Veterinary Internal Medicine*, 32(3), 1041–1050. <https://doi.org/10.1111/jvim.15089>
148. Mandell, C. P., Jain, N. C., & Farver, T. B. (1989). The significance of normoblastemia and leukoerythroblastic reaction in the dog. *Journal of the American Animal Hospital Association*, 25(6), 665–672.
149. Martin, D. M., Hall, J., Keirstead, N., & Lowe, A. (2006). Multifocal osteoma cutis in a golden retriever. *Canadian Veterinary Journal*, 47, 360–362.
150. Martinez, C., Mooney, C. T., Shiel, R. E., Tang, P. K., Mooney, L., & O'Neill, E. J. (2019). Evaluation of red blood cell distribution width in dogs with various illnesses. *Canadian Veterinary Journal*, 60, 694–671.
151. Maruyama, H., Yamagami, H., Watari, T., Kano, R., Fujino, Y., Tsujimoto, H., Hasegawa, A., & Kamata, H. (2009). Reticulated Platelet Levels in Whole Blood and Platelet-Rich Plasma of Dogs with Various Platelet Counts Measured by Flow Cytometry. *Journal of Veterinary Medical Science*, 71(2), 195–197. <https://doi.org/10.1292/jvms.71.195>
152. Máthé, Á., Vörös, K., Papp, L., & Reiczigel, J. (2006). Clinical manifestations of canine babesiosis in Hungary (63 cases). *Acta Veterinaria Hungarica*, 54(3), 367–385. <https://doi.org/10.1556/avet.54.2006.3.7>
153. Mazepa, A. W., Kidd, L. B., Young, K. M., & Trepanier, L. A. (2010). Clinical Presentation of 26 *Anaplasma phagocytophilum*-Seropositive Dogs Residing in an Endemic Area. *Journal of the American Animal Hospital Association*, 46(6), 405–412. <https://doi.org/10.5326/0460405>
154. McAnulty, J. F., & Rudd, R. G. (1985). Thrombocytopenia associated with vaccination of a dog with a modified-live paramyxovirus vaccine. *Journal of the American Veterinary Medical Association*, 186(11), 1217–1219.
155. McAtee, B. B., Cummings, K. J., Cook, A. K., Lidbury, J. A., Heseltine, J. C., & Willard, M. D. (2017). Opportunistic Invasive Cutaneous Fungal Infections Associated with Administration of Cyclosporine to Dogs with Immune-mediated Disease. *Journal of Veterinary Internal Medicine*, 31(6), 1724–1729. <https://doi.org/10.1111/jvim.14824>

156. McVey, D. S., & Shuman, W. S. (1989). Detection of antiplatelet immunoglobulin in thrombocytopenic dogs. *Veterinary Immunology and Immunopathology*, 22(2), 101–111. [https://doi.org/10.1016/0165-2427\(89\)90053-6](https://doi.org/10.1016/0165-2427(89)90053-6)
157. Mellor, P. J., Roulois, A. J. A., Day, M. J., Blacklaws, B. A., Knivett, S. J., & Herrtage, M. E. (2005). Neutrophilic dermatitis and immunemediated haematological disorders in a dog: Suspected adverse reaction to carprofen. *Journal of Small Animal Practice*, 46(5), 237–242. <https://doi.org/10.1111/j.1748-5827.2005.tb00316.x>
158. Mezzano, D., Aranda, E., García, M. E., Pereira, J., Quiroga, T., & Pérez, M. (1992). Total sialic acid in human and canine platelets does not change with the platelet age. *American Journal of Hematology*, 40(1), 5–11. <https://doi.org/10.1002/ajh.2830400103>
159. Mezzano, D., del Pino, G. E., Montesinos, M., García, M. E., Aranda, E., & Foradori, A. (1991). Platelet 5-Hydroxytryptamine Increases with Platelet Age in Dogs. *Thrombosis and Haemostasis*, 66(2), 254–258. <https://doi.org/10.1055/s-0038-1646399>
160. Michimoto, T., Okamura, T., Suzuki, K., Watari, T., Kano, R., & Hasegawa, A. (2004). Thiazole Orange Positive Platelets in a Dog with Evans' Syndrome. *Journal of Veterinary Medical Science*, 66(10), 1305–1306. <https://doi.org/10.1292/jvms.66.1305>
161. Middleton, S. M. (2005). Immune-mediated thrombocytopenia in a 4-month-old German shepherd dog. *Canadian Veterinary Journal*, 46, 443–445.
162. Moraes, L. F., Takahira, R. K., Golim, M. de A., & Baggio, M. S. (2016). Avaliação das alterações hemostáticas e do risco tromboembólico em cães com AHIM. *Pesquisa Veterinária Brasileira*, 36(5), 405–411. <https://doi.org/10.1590/S0100-736X2016000500009>
163. Morley, P., Mathes, M., Guth, A., & Dow, S. (2008). Anti-Erythrocyte Antibodies and Disease Associations in Anemic and Nonanemic Dogs. *Journal of Veterinary Internal Medicine*, 22(4), 886–892. <https://doi.org/10.1111/j.1939-1676.2008.0112.x>
164. Murtaugh, R. J., & Jacobs, R. M. (1985). Suspected immune-mediated megakaryocytic hypoplasia or aplasia in a dog. *Journal of the American Veterinary Medical Association*, 186(12), 1313–1315.
165. Mylonakis, M. E., Saridomichelakis, M. N., Lazaridis, V., Leontides, L. S., Kostoulas, P., & Koutinas, A. F. (2008). A retrospective study of 61 cases of spontaneous canine epistaxis (1998 to 2001). *Journal of Small Animal Practice*, 49(4), 191–196. <https://doi.org/10.1111/j.1748-5827.2007.00441.x>
166. Nair, A. D. S., Cheng, C., Ganta, C. K., Sanderson, M. W., Alleman, A. R., Munderloh, U. G., & Ganta, R. R. (2016). Comparative Experimental Infection Study in Dogs with Ehrlichia canis, E. chaffeensis, Anaplasma platys and A. phagocytophilum. *PLoS One*, 11(2), e0148239. <https://doi.org/10.1371/journal.pone.0148239>
167. Nakamura, R. K., Fenty, R. K., & Bianco, D. (2013). Presumptive immune-mediated thrombocytopenia secondary to massive Africanized bee envenomation in a dog: Africanized bee

envenomation in a dog. *Journal of Veterinary Emergency and Critical Care*, 23(6), 652–656.

<https://doi.org/10.1111/vec.12120>

168. Nassiri, S. M., Chegeni, S., Rezaei, M., Mohammadi, E., & Izadi, S. (2010). Polycythemia vera-related MDS in a dog. *Comparative Clinical Pathology*, 19(6), 627–630. <https://doi.org/10.1007/s00580-010-1074-6>
169. Neelawala, D., Dissanayake, D. R. A., Prasada, D. V. P., & Silva, I. D. (2021). Analysis of risk factors associated with recurrence of canine babesiosis caused by *Babesia gibsoni*. *Comparative Immunology, Microbiology and Infectious Diseases*, 74, 101572. <https://doi.org/10.1016/j.cimid.2020.101572>
170. Nerhagen, S., Moberg, H. L., Boge, G. S., & Glanemann, B. (2021). Prednisolone-induced diabetes mellitus in the cat: A historical cohort. *Journal of Feline Medicine and Surgery*, 23(2), 175–180. <https://doi.org/10.1177/1098612X20943522>
171. Newton, P. L., & Manens, J. (2018). Successful treatment of disseminated neosporosis in an immune-suppressed dog. *Australian Veterinary Practitioner*, 48(2), 56–60.
172. Ng, Z. Y., Stokes, J. E., Alvarez, L., & Bartges, J. W. (2016). Cryopreserved platelet concentrate transfusions in 43 dogs: A retrospective study (2007-2013): Cryopreserved platelets concentrate in dogs. *Journal of Veterinary Emergency and Critical Care*, 26(5), 720–728. <https://doi.org/10.1111/vec.12503>
173. Niebauer, G. W. (1983). Ein Fall von autoimmuner Thrombozytopenie beim Hund und seine Behandlung mit Vincristin. *Wiener tierärztliche Monatsschrift*, 70(5), 170–172.
174. Northern, J., & Tvedten, H. W. (1992). Diagnosis of microthrombocytosis and immune-mediated thrombocytopenia in dogs with thrombocytopenia: 68 cases (1987-1989). *Journal of the American Veterinary Medical Association*, 200(3), 368–372.
175. Öberg, J., & Tvedten, H. (2010). Thromboelastography in a cat with steroid responsive thrombocytopenia. *Comparative Clinical Pathology*, 19(4), 429–431. <https://doi.org/10.1007/s00580-010-0978-5>
176. O'Brien, R. T., & Wood, E. F. (1998). Urinary Bladder Mural Hemorrhage Associated with Systemic Bleeding Disorders in Three Dogs. *Veterinary Radiology & Ultrasound*, 39(4), 354–356. <https://doi.org/10.1111/j.1740-8261.1998.tb01620.x>
177. Ohno, K., Uno, M., Suzuki, H., Masuda, K., & Tsujimoto, H. (2003). Canine Refractory Immune-mediated Thrombocytopenia Treated with Leflunomide. *Journal of the Japan Veterinary Medical Association*, 56(10), 669–672. <https://doi.org/10.12935/jvma1951.56.669>
178. Øines, Ø., Storli, K., & Brun-Hansen, H. (2010). First case of babesiosis caused by *Babesia canis canis* in a dog from Norway. *Veterinary Parasitology*, 171(3–4), 350–353. <https://doi.org/10.1016/j.vetpar.2010.03.024>

179. O'Marra, S. K., Delaforcade, A. M., & Shaw, S. P. (2011). Treatment and predictors of outcome in dogs with immune-mediated thrombocytopenia. *Journal of the American Veterinary Medical Association*, 238(3), 346–352. <https://doi.org/10.2460/javma.238.3.346>
180. O'Marra, S. K., Shaw, S. P., & deLaforcade, A. M. (2011). Investigating hypercoagulability during treatment for immune-mediated thrombocytopenia: A pilot study: Investigating hypercoagulability in ITP. *Journal of Veterinary Emergency and Critical Care*, 22(1), 126–130. <https://doi.org/10.1111/j.1476-4431.2011.00658.x>
181. O'Neill, E. J., Acke, E., Tobin, E., & McCarthy, G. (2010). Immune-mediated thrombocytopenia associated with angiostrongylus vasorum infection in a Jack Russell terrier. *Irish Veterinary Journal*, 63(7), 434. <https://doi.org/10.1186/2046-0481-63-7-434>
182. Orcutt, E. S., Lee, J. A., & Bianco, D. (2010). Immune-mediated hemolytic anemia and severe thrombocytopenia in dogs: 12 cases (2001-2008): Immune-mediated hemolytic anemia and thrombocytopenia in dogs. *Journal of Veterinary Emergency and Critical Care*, 20(3), 338–345. <https://doi.org/10.1111/j.1476-4431.2010.00540.x>
183. Paim, C. B., Paim, F. C., Da Silva, A. S., França, R. T., Costa, M. M., Leal, C. A. M., Soares, J. F., Labruna, M. B., Schetinger, M. R. C., Mazzanti, A., Mazzanti, C. M., Monteiro, S. G., & Lopes, S. T. A. (2012). Thrombocytopenia and platelet activity in dogs experimentally infected with *Rangelia vitalii*. *Veterinary Parasitology*, 185(2–4), 131–137. <https://doi.org/10.1016/j.vetpar.2011.09.039>
184. Pankraz, A., Bauer, N., & Moritz, A. (2009). Comparison of flow cytometry with the Sysmex XT2000iV automated analyzer for the detection of reticulated platelets in dogs. *Veterinary Clinical Pathology*, 38(1), 30–38. <https://doi.org/10.1111/j.1939-165X.2008.00086.x>
185. Paraš, G., Paraš, S., Lukač, B., Čegar, I., & Vitković, O. (2019). Idiopathic Thrombocytopenia in Dogs—Case Report. *ВЕТЕРИНАРСКИ ЖУРНАЛ РЕПУБЛИКЕ СРПСКЕ*, 19(1), 83–89. <https://doi.org/10.7251/VETJEN1901083P>
186. Park, H.-J., Kim, J.-W., Song, K.-H., & Seo, K.-W. (2015). Application of vincristine-loaded platelet therapy in three dogs with refractory immune-mediated thrombocytopenia. *Journal of Veterinary Science*, 16(1), 127–130. <https://doi.org/10.4142/jvs.2015.16.1.127>
187. Penhale, W., Day, M., Lines, A., & McKenna, R. (1990). A review of cases submitted to Murdoch University for immunodiagnostic testing: 1978–1989. *Australian Veterinary Journal*, 67(4), 148–149. <https://doi.org/10.1111/j.1751-0813.1990.tb07737.x>
188. Peterson, M. E., Kintzer, P. P., & Hurvitz, A. I. (1988). Methimazole Treatment of 262 Cats With Hyperthyroidism. *Journal of Veterinary Internal Medicine*, 2(3), 150–157. <https://doi.org/10.1111/j.1939-1676.1988.tb02812.x>
189. Piek, C. J., Junius, G., Dekker, A., Schrauwen, E., Slappendel, R. J., & Teske, E. (2008). Idiopathic Immune-Mediated Hemolytic Anemia: Treatment Outcome and Prognostic Factors in 149 Dogs. *Journal of Veterinary Internal Medicine*, 22(2), 366–373. <https://doi.org/10.1111/j.1939-1676.2008.0060.x>



190. Pierce, K. R., Marrs, G. E., & Hightower, D. (1977). Acute canine ehrlichiosis: Platelet survival and factor 3 assay. *American Journal of Veterinary Research*, 38(11), 1821–1825.
191. Płoneczka-Janeczko, K., & Rypuła, K. (2011). Application of a flow cytometry in differentiation of antibodies accompanying platelets in Ehrlichia canis and Borrelia burgdorferi infections in dogs. *Central European Journal of Immunology*, 36(3), 174–179.
192. Polydoros, T., Ioannidi, O. M., Korsavvidis, I., Stefanidis, S., Antoniadis, T., & Mylonakis, M. E. (2021). Romiplostim as Adjunctive Treatment of Refractory Amegakaryocytic Immune Thrombocytopenia in a Dog. *Topics in Companion Animal Medicine*, 42, 100488. <https://doi.org/10.1016/j.tcam.2020.100488>
193. Prihirunkit, K., Choothesa, A., Salakij, C., & Pisetpaisan, A. (2010). Immune-mediated hemolytic anemia in a dog with acute monoblastic leukemia. *Comparative Clinical Pathology*, 19(6), 631–634. <https://doi.org/10.1007/s00580-010-1092-4>
194. Putsche, J. C., & Kohn, B. (2008). Primary Immune-mediated Thrombocytopenia in 30 Dogs (1997–2003). *Journal of the American Animal Hospital Association*, 44(5), 250–257. <https://doi.org/10.5326/0440250>
195. Quorollo, B. A., Buch, J., Chandrashekar, R., Beall, M. J., Breitschwerdt, E. B., Yancey, C. B., Caudill, A. H., & Comyn, A. (2019). Clinicopathological findings in 41 dogs (2008-2018) naturally infected with Ehrlichia ewingii. *Journal of Veterinary Internal Medicine*, 33(2), 618–629. <https://doi.org/10.1111/jvim.15354>
196. Raguvaran, R., Mondal, R. S. K., & Mondal, D. B. (2019). Management of Immune Mediated Hemolytic Anemia (IMHA) Secondary to Paracetamol Toxicity in a Dog. *Intas Polivet*, 20(1), 180–181.
197. Rakshit, S., Clark, D., Roy, K., & Datta, I. C. (2020). Immune-mediated hemolytic anemia in a cat: Diagnosis and treatment. *Haryana Veterinarian*, 59(2), 276–278.
198. Ralph, A. G., Saunders, A. B., Hariu, C. D., & Nabity, M. (2011). Spontaneous echocardiographic contrast in three dogs: Spontaneous echocardiographic contrast in dogs. *Journal of Veterinary Emergency and Critical Care*, 21(2), 158–165. <https://doi.org/10.1111/j.1476-4431.2011.00624.x>
199. Reimer, M. E., Troy, G. C., & Warnick, L. D. (1999). Immune-mediated hemolytic anemia: 70 cases (1988-1996). *Journal of the American Animal Hospital Association*, 35(5), 384–391. <https://doi.org/10.5326/15473317-35-5-384>
200. Ridyard, A. E., Shaw, D. J., & Milne, E. M. (2010). Evaluation of platelet activation in canine immune-mediated haemolytic anaemia. *Journal of Small Animal Practice*, 51(6), 296–304. <https://doi.org/10.1111/j.1748-5827.2010.00935.x>
201. Roseler, B. J. E., & Mason, K. V. (1994). Use of danazol and corticosteroids for the treatment of immune-mediated thrombocytopaenia in a dog. *Australian Veterinary Practitioner*, 24(3), 126–130.
202. Roseler, B. J. E., & Mason, K. V. (1996). Use of danazol and corticosteroids for the treatment of immune-mediated thrombocytopenia in a dog. *Journal of Veterinary Allergy and Clinical Immunology*, 4(2), 53–56.

203. Rozanski, E. A., Callan, M. B., Hughes, D., Sanders, N., & Giger, U. (2002). Comparison of platelet count recovery with use of vincristine and prednisone or prednisone alone for treatment for severe immune-mediated thrombocytopenia in dogs. *Journal of the American Veterinary Medical Association*, 220(4), 477–481. <https://doi.org/10.2460/javma.2002.220.477>
204. Saastamoinen, J., Rutter, C. R., & Jeffery, U. (2019). Subconjunctival haemorrhage in 147 dogs. *Journal of Small Animal Practice*, 60(12), 755–760. <https://doi.org/10.1111/jsap.13081>
205. Saberi, M., Akhtardanesh, B., & Mohebbi, E. (2012). Treatment of Evan's syndrome by leflunomide and desmopressin in a mixed-breed dog. *Comparative Clinical Pathology*, 21(4), 485–488. <https://doi.org/10.1007/s00580-012-1510-x>
206. Sakai, H., Tamura, S., & Sakai, K. (2014). Amegakaryocytic thrombocytopenia in a dog. *Journal of Animal Clinical Medicine*, 23(1), 34–37.
207. Sangeetha, S. G., Ajith, Y., Dixit, S. K., & Reena, K. K. (2017). PCR Based Diagnosis and Clinical Management of Ehrlichiosis in a Dog. *Intas Polivet*, 18(1), 187–191.
208. Santoro, S. K., Garrett, L. D., & Wilkerson, M. (2007). Platelet Concentrations and Platelet-Associated IgG in Greyhounds. *Journal of Veterinary Internal Medicine*, 21(1), 107–112. <https://doi.org/10.1111/j.1939-1676.2007.tb02935.x>
209. Sato, M., Veir, J. K., Shropshire, S. B., & Lappin, M. R. (2020). *Ehrlichia canis* in dogs experimentally infected, treated, and then immune suppressed during the acute or subclinical phases. *Journal of Veterinary Internal Medicine*, 34(3), 1214–1221. <https://doi.org/10.1111/jvim.15750>
210. Schoeman, T., Lobetti, R. G., Jacobson, L. S., & Penzhorn, B. L. (2001). Feline babesiosis: Signalment, clinical pathology and concurrent infections. *Journal of the South African Veterinary Association*, 72(1), 4–11. <https://doi.org/10.4102/jsava.v72i1.601>
211. Schwartz, D., Sharkey, L., Armstrong, P. J., Knudson, C., & Kelley, J. (2014). Platelet Volume and Plateletcrit in Dogs with Presumed Primary Immune-Mediated Thrombocytopenia. *Journal of Veterinary Internal Medicine*, 28(5), 1575–1579. <https://doi.org/10.1111/jvim.12405>
212. Scott, M. A., Kaiser, L., Davis, J. M., & Schwartz, K. A. (2002). Development of a sensitive immunoradiometric assay for detection of platelet surface-associated immunoglobulins in thrombocytopenic dogs. *American Journal of Veterinary Research*, 63(1), 124–129. <https://doi.org/10.2460/AJVR.2002.63.124>
213. Scott, T. N., Bailin, H. G., Jutkowitz, L. A., Scott, M. A., & Lucidi, C. A. (2021). Bone marrow, blood, and clinical findings in dogs treated with phenobarbital. *Veterinary Clinical Pathology*, 50(1), 122–131. <https://doi.org/10.1111/vcp.13013>
214. Scott-Moncrieff, J., Treadwell, N., McCullough, S., & Brooks, M. (2001). Hemostatic abnormalities in dogs with primary immune-mediated hemolytic anemia. *Journal of the American Animal Hospital Association*, 37(3), 220–227. <https://doi.org/10.5326/15473317-37-3-220>

215. Scuderi, M. A., Snead, E., Mehain, S., Waldner, C., & Epp, T. (2016). Outcome based on treatment protocol in patients with primary canine immune-mediated thrombocytopenia: 46 cases (2000-2013). *Canadian Veterinary Journal*, *57*, 514–518.
216. Sekiguchi, T., Vigani, A., Ripoll, A. Z., Taylor, S., Culler, C., & Suter, S. E. (2020). Clinical Application of Apheresis in Very Small Dogs Weighing <8 kg to Pediatric Patients. *Therapeutic Apheresis and Dialysis*, *24*(3), 333–342. <https://doi.org/10.1111/1744-9987.13432>
217. Şentürk, S., & Temizel, M. (2001). Bir Köpekte İmmun ilişkili Hemolitik Anemi ve Trombositopenin Vincristine ile Tedavisi. *Veteriner Fakültesi Dergisi, Uludağ Üniversitesi*, *20*(3), 85–91.
218. Şentürk, S., Temizel, M., Cihan, H., & Aytuğ, N. (2010). Comparison of the effects of Prednisolon, Danazol and Testosteron propionat therapy in dogs with immune mediated hemolytic anemia and thrombocytopenia. *Veteriner Fakültesi Dergisi, Uludağ Üniversitesi*, *29*(2), 57–63.
219. Shropshire, S., Dow, S., & Lappin, M. (2018). Validation of a clinically applicable flow cytometric assay for the detection of immunoglobulin associated platelets in dogs. *Veterinary Immunology and Immunopathology*, *202*, 109–114. <https://doi.org/10.1016/j.vetimm.2018.07.003>
220. Shropshire, S., Dow, S., & Lappin, M. (2020). Detection and dynamics of anti-platelet antibodies in thrombocytopenic dogs with and without idiopathic immune thrombocytopenia. *Journal of Veterinary Internal Medicine*, *34*(2), 700–709. <https://doi.org/10.1111/jvim.15737>
221. Shropshire, S., Olver, C., & Lappin, M. (2018). Characteristics of hemostasis during experimental *Ehrlichia canis* infection. *Journal of Veterinary Internal Medicine*, *32*(4), 1334–1342. <https://doi.org/10.1111/jvim.15130>
222. Silva, L. F. N., Golim, M. A., & Takahira, R. K. (2012). Measurement of thrombopoietic activity through the quantification of megakaryocytes in bone marrow cytology and reticulated platelets. *Research in Veterinary Science*, *93*(1), 313–317. <https://doi.org/10.1016/j.rvsc.2011.07.005>
223. Silva, M. C., Pereira, M., & Márquez, A. G. (1995). Remission in three cases of immune-mediated thrombocytopenia in dogs treated with glucocorticoids. *Revista de Medicina Veterinaria (Buenos Aires)*, *76*(5), 306–308.
224. Simpson, K., Chapman, P., & Klag, A. (2018). Long-term outcome of primary immune-mediated thrombocytopenia in dogs. *Journal of Small Animal Practice*, *59*(11), 674–680. <https://doi.org/10.1111/jsap.12912>
225. Singh, M., & Lamb, W. (2005). Idiopathic thrombocytopenia in Cavalier King Charles Spaniels. *Australian Veterinary Journal*, *83*(11), 700–703. <https://doi.org/10.1111/j.1751-0813.2005.tb13055.x>
226. Singh, T. P., & Pangawkar, G. R. (1998). Haemostatic disorders in dogs infected with transmissible venereal tumour. *Indian Veterinary Journal*, *75*(10), 879–881.
227. Smith, C., & Tappin, S. (2012). Evans Syndrome (immune-mediated haemolytic anaemia with immune-mediated thrombocytopenia) in a three-year-old male neutered Springer Spaniel. *Companion Animal*, *17*(4), 31–35. <https://doi.org/10.1111/j.2044-3862.2012.00178.x>

228. Smith, J. R., Smith, K. F., & Brainard, B. M. (2014). Platelet parameters from an automated hematology analyzer in dogs with inflammatory clinical diseases. *The Veterinary Journal*, 201(3), 406–411. <https://doi.org/10.1016/j.tvjl.2014.07.009>
229. Smith, J., Schaer, M., & Chandra, S. (1999). Chronic thrombocytopenia and epistaxis in a cat. *Feline Practice*, 27(3), 5–9.
230. Snead, E., Vargo, C., & Myers, S. (2011). Glucocorticoid-dependent hypoadrenocorticism with thrombocytopenia and neutropenia mimicking sepsis in a Labrador retriever dog. *Canadian Veterinary Journal*, 52, 1129–1134.
231. Souza, A., Pereira, J., Campos, S., Torres-Filho, R., Xavier, M., Bacellar, D., & Almosny, N. (2016). Platelet indices in dogs with thrombocytopenia and dogs with normal platelet counts. *Archivos de Medicina Veterinaria*, 48(3), 277–281. <https://doi.org/10.4067/S0301-732X2016000300005>
232. Sugar, N., Paitan, Y., Merhavi, N., Aroch, I., & Kelmer, E. (2018). Erysipelothrix rhusiopathiae infectious endocarditis and putative secondary immune mediated hemolytic anemia and thrombocytopenia in a dog, and a literature review. *Israel Journal of Veterinary Medicine*, 73(4), 30–38.
233. Sullivan, P. S., Arrington, K., West, R., & McDonald, T. P. (1992). Thrombocytopenia associated with administration of trimethoprim/sulfadiazine in a dog. *Journal of the American Veterinary Medical Association*, 201(11), 1741–1744.
234. Sundburg, C. R., Belanger, J. M., Bannasch, D. L., Famula, T. R., & Oberbauer, A. M. (2016). Gonadectomy effects on the risk of immune disorders in the dog: A retrospective study. *BMC Veterinary Research*, 12(1), 278. <https://doi.org/10.1186/s12917-016-0911-5>
235. Takahashi, Y., Hirakawa, A., Yamamoto, N., Tanaka, M., Yoshida, M., Kuwahara, K., Ura, A., Anami, T., & Doumori, A. (2015). Two Canine Cases with Immune-mediated Thrombocytopenia Which Had Maintained Remission by Administration of Leflunomide. *Journal of Animal Clinical Medicine*, 24(3), 132–137. <https://doi.org/10.11252/dobutsurinshoigaku.24.132>
236. Tamí, I., Martínez, J. I., Tamí, M., Redondo, M. C., Finol, H., & Simonovis, N. (1996). Identification of Ehrlichia Species in Blood Smear: *Infectious Diseases in Clinical Practice*, 5(9), 555–557. <https://doi.org/10.1097/00019048-199612000-00011>
237. Tappin, S. (2007). Immune mediated thrombocytopenia in a 2-year-old Lurcher. *UK Vet: Companion Animal*, 12(6), 37–43.
238. Tasker, S., Mackin, A. J., & Day, M. J. (1999). Primary immune-mediated thrombocytopenia in a cat. *Journal of Small Animal Practice*, 40(3), 127–131. <https://doi.org/10.1111/j.1748-5827.1999.tb03054.x>
239. Terrazzano, G., Cortese, L., Piantedosi, D., Zappacosta, S., Di Loria, A., Santoro, D., Ruggiero, G., & Ciaramella, P. (2006). Presence of anti-platelet IgM and IgG antibodies in dogs naturally infected by Leishmania infantum. *Veterinary Immunology and Immunopathology*, 110(3–4), 331–337. <https://doi.org/10.1016/j.vetimm.2005.11.001>

240. Theilen, G. (1997). Possible relationships between canine hematopoietic neoplasia, other malignancies and immune mediated diseases. *Leukemia (Basingstoke)*, 11(S3), 187–188.
241. Tsuchiya, R. (2004). Study of intravenous IgG therapy for dogs with immune-mediated thrombocytopenia. *Journal of Azabu University*, 9/10, 188–190.
242. Tsuchiya, R., Komatsu, T., Ishikawa, T., Neo, S., McConnell, M. F., Hisasue, M., & Yamada, T. (2010). Preparation of Positive Control Platelets for Detection of Canine Platelet Surface-Associated IgG, IgM and Complement (C3) by Flow Cytometry. *Journal of Veterinary Medical Science*, 72(8), 1063–1066. <https://doi.org/10.1292/jvms.09-0405>
243. Unknown. (2003). Platelet characteristics in dogs with immune-mediated thrombocytopenia. *Advances in Small Animal Medicine and Surgery*, 16(5), 3–4.
244. Vargo, C. L., Taylor, S. M., & Haines, D. M. (2007). Immune mediated neutropenia and thrombocytopenia in 3 giant schnauzers. *Canadian Veterinary Journal* 48(11), 1159–1163.
245. Vasilopoulos, R. J., Mackin, A., Lavergne, S. N., & Trepanier, L. A. (2005). Nephrotic syndrome associated with administration of sulfadimethoxine/ ormetoprim in a dobermann. *Journal of Small Animal Practice*, 46(5), 232–236. <https://doi.org/10.1111/j.1748-5827.2005.tb00315.x>
246. Vazquez, L. (2018). Primary immune mediated thrombocytopenia in a Dachshund. *Point Vétérinaire*, 49(388), 54–60.
247. Vijayalakshmi, P., Srinivasan, S. R., Vairamuthu, S., Mangalagowri, A., Latha, B. R., & Nambi, A. P. (2014). Clinico pathological features in dogs associated with babesiosis. *Indian Veterinary Journal*, 91(4), 21–24.
248. Violette, N. P., & Ledbetter, E. C. (2017). Intracorneal stromal hemorrhage in dogs and its associations with ocular and systemic disease: 39 cases. *Veterinary Ophthalmology*, 20(1), 27–33. <https://doi.org/10.1111/vop.12340>
249. Volkmann, M., Hepworth, M. R., Ebner, F., Rausch, S., Kohn, B., & Hartmann, S. (2014). Frequencies of regulatory T cells in the peripheral blood of dogs with primary immune-mediated thrombocytopenia and chronic enteropathy: A pilot study. *The Veterinary Journal*, 202(3), 630–633. <https://doi.org/10.1016/j.tvjl.2014.10.012>
250. Waldrop, J. E., Rozanski, E. A., Freeman, L. M., & Rush, J. E. (2003). Packed Red Blood Cell Transfusions in Dogs With Gastrointestinal Hemorrhage: 55 Cases (1999–2001). *Journal of the American Animal Hospital Association*, 39(6), 523–527. <https://doi.org/10.5326/0390523>
251. Walton, M. B., Mardell, E., Spoor, M., & Innes, J. (2014). Lameness associated with tarsal haemarthrosis as the sole clinical sign of idiopathic immune-mediated thrombocytopenia in a dog. *Veterinary and Comparative Orthopaedics and Traumatology*, 27(06), 491–495. <https://doi.org/10.3415/VCOT-14-03-0041>

252. Waner, T., Harrus, S., Weiss, D. J., Bark, H., & Keysary, A. (1995). Demonstration of serum antiplatelet antibodies in experimental acute canine ehrlichiosis. *Veterinary Immunology and Immunopathology*, 48(1-2), 177-182. [https://doi.org/10.1016/0165-2427\(95\)05420-B](https://doi.org/10.1016/0165-2427(95)05420-B)
253. Waner, T., Leykin, I., Shinitsky, M., Sharabani, E., Buch, H., Keysary, A., Bark, H., & Harrus, S. (2000). Detection of platelet-bound antibodies in beagle dogs after artificial infection with *Ehrlichia canis*. *Veterinary Immunology and Immunopathology*, 77, 145-150.
254. Waner, T., & Lurie, S. (1992). Aspirin implicated immune-mediated haemolytic anaemia and thrombocytopenia in a dog—A case report. *Israel Journal of Veterinary Medicine*, 47(3), 112-115.
255. Wataru, T., Tsujimoto, H., Ono, K., & Hasegawa, A. (1998). Platelet Aggregation in Canine Idiopathic Thrombocytopenic Purpura. *Journal of the Japan Veterinary Medical Association*, 51(6), 309-312. <https://doi.org/10.12935/jvma1951.51.309>
256. Waye, J. W. (1960). Idiopathic thrombocytopenic purpura in a dog. *Canadian Veterinary Journal*, 1(12), 569-571.
257. Weingart, C., Thielemann, D., & Kohn, B. (2019). Primary immune-mediated haemolytic anaemia: A retrospective long-term study in 61 dogs. *Australian Veterinary Journal*, 97(12), 483-489. <https://doi.org/10.1111/avj.12875>
258. Weiss, D. J. (2007). Acute bone marrow stromal injury in the dog. *Comparative Clinical Pathology*, 16(4), 223-228. <https://doi.org/10.1007/s00580-007-0698-7>
259. Weiss, D. J., & Aird, B. (2001). Cytologic Evaluation of Primary and Secondary Myelodysplastic Syndromes in the Dog. *Veterinary Clinical Pathology*, 30(2), 67-75. <https://doi.org/10.1111/j.1939-165X.2001.tb00261.x>
260. Weiss, D. J., & Henson, M. (2007). Pure white cell aplasia in a dog. *Veterinary Clinical Pathology*, 36(4), 373-375. <https://doi.org/10.1111/j.1939-165X.2007.tb00445.x>
261. Weiss, D. J., & Townsend, E. (1998). Evaluation of reticulated platelets in dogs. *Comparative Haematology International*, 8(3), 166-170. <https://doi.org/10.1007/BF02642508>
262. Weiss, Douglas J. (2004). Selective dysmegakaryopoiesis in thrombocytopenic dogs (1996-2002). *Comparative Clinical Pathology*, 13, 24-28. <https://doi.org/10.1007/s00580-004-0515-5>
263. Wilkerson, M. J., & Shuman, W. (2001). Alterations in Normal Canine Platelets During Storage in EDTA Anticoagulated Blood. *Veterinary Clinical Pathology*, 30(3), 107-113. <https://doi.org/10.1111/j.1939-165X.2001.tb00417.x>
264. Wilkerson, M. J., Shuman, W., Swist, S., Harkin, K., Meinkoth, J., & Kocan, A. A. (2001). Platelet Size, Platelet Surface-Associated IgG, and Reticulated Platelets in Dogs with Immune-Mediated Thrombocytopenia. *Veterinary Clinical Pathology*, 30(3), 141-149. <https://doi.org/10.1111/j.1939-165X.2001.tb00423.x>
265. Wilkins, R. J., Hurvitz, A. I., & Dodds-Laffin, W. J. (1973). Immunologically mediated thrombocytopenia in the dog. *Journal of the American Veterinary Medical Association*, 163(3), 277-282.

266. Williams, D. A., & Maggio-Price, L. (1984). Canine idiopathic thrombocytopenia: Clinical observations and long-term follow-up in 54 cases. *Journal of the American Veterinary Medical Association*, 185(6), 660–663.
267. Wondratschek, C., Weingart, C., & Kohn, B. (2010). Primary Immune-Mediated Thrombocytopenia in Cats. *Journal of the American Animal Hospital Association*, 46(1), 12–19.  
<https://doi.org/10.5326/0460012>
268. Woods, J. P., Johnstone, I. B., Bienzle, D., Balson, G., & Gartley, C. J. (1995). Concurrent lymphangioma, immune-mediated thrombocytopenia, and von Willebrand's disease in a dog. *Journal of the American Animal Hospital Association*, 31(1), 70–76. <https://doi.org/10.5326/15473317-31-1-70>
269. Worthing, K. A., Norris, J. M., & Briscoe, K. A. (2019). Severe acute cellulitis and sepsis caused by *Aeromonas* spp. In a dog on immunosuppressive therapy. *Journal of Veterinary Emergency and Critical Care*, 29(4), 444–449. <https://doi.org/10.1111/vec.12867>
270. Yau, V. K., & Bianco, D. (2014). Treatment of five haemodynamically stable dogs with immune-mediated thrombocytopenia using mycophenolate mofetil as single agent. *Journal of Small Animal Practice*, 55(6), 330–333. <https://doi.org/10.1111/jsap.12203>
271. Zenker, I., Keller, L., Meichner, K., Unterer, S., & Hartmann, K. (2009). Immune mediated destruction of platelets in dogs with heat stroke: A prospective study. *Tierärztliche Praxis Ausgabe K: Kleintiere / Heimtiere*, 37(K), 314–318. <https://doi.org/10.1055/s-0038-1622811>
272. Zini, E., Hauser, B., Meli, M. L., & Glaus, T. M. (2007). Immune-mediated erythroid and megakaryocytic aplasia in a cat. *Journal of the American Veterinary Medical Association*, 230(7), 1024–1027. <https://doi.org/10.2460/javma.230.7.1024>
273. Zygnier, W., Gójska-Zygnier, O., & Szmiedt, K. (2011). Vincristine and cyclophosphamide in the treatment of persistent anemia and thrombocytopenia related to *Babesia canis* infection in dog. *Zycie Weterynaryjne*, 86(5), 374–378.

#### Studies identified via evidence evaluator knowledge

274. Bestwick JP, Skelly BJ, Swann JW, Glanemann B, Bexfield N, Gkoka Z, Walker DJ, Silvestrini P, Adamantos S, Seth M, Warland J. (2022). Splenectomy in the management of primary immune-mediated hemolytic anemia and primary immune-mediated thrombocytopenia in dogs. *Journal of Veterinary Internal Medicine*, 36(4), 1267-1280. <https://doi.org/10.1111/jvim.16469>
275. Saint-Pierre LM, Farrell KS, Hopper K, Reagan KL. (2023). Retrospective evaluation of fresh platelet concentrate administration in dogs: Patient characteristics, outcomes, and transfusion practices in 189 transfusion episodes (2008-2019). *Journal of Veterinary Emergency and Critical Care*, 33(3), 360-370. <https://doi.org/10.1111/vec.13281>
276. Sri-Jayantha, L. S., Doornink, M. T., & Urie, B. K. (2022). Increased risk of select glucocorticoid adverse events in dogs of higher body weight. *Canadian Veterinary Journal*, 63, 32–38.

277. Wolf, A. M. (1983). Vincristine therapy of chronic thrombocytopenia in the dog. *Southwestern Veterinarian*, 35(3), 209–215.

#### Studies identified via Scopus forward citation searching

278. Abrams-Ogg, A. C., Kruth, S. A., Carter, R. F., Valli, V. E., Kamel-Reid, S., & Dubé, I. D. (1993). Preparation and transfusion of canine platelet concentrates. *American Journal of Veterinary Research*, 54(4), 635–642.
279. Appleman, E. H., Sachais, B. S., Patel, R., Drobatz, K. J., Groman, R. P., Kennedy, D. R., O'Donnell, P. A., Bryan, C., & Callan, M. B. (2009). Cryopreservation of Canine Platelets. *Journal of Veterinary Internal Medicine*, 23(1), 138–145. <https://doi.org/10.1111/j.1939-1676.2008.0225.x>
280. Bode, A. P., Lust, R. M., Read, M. S., & Fischer, T. H. (2008). Correction of the Bleeding Time With Lyophilized Platelet Infusions in Dogs on Cardiopulmonary Bypass. *Clinical and Applied Thrombosis/Hemostasis*, 14(1), 38–54. <https://doi.org/10.1177/1076029607304746>
281. Brecher, G., & Cronkite, E. P. (1953). The effects of platelet transfusions in dogs made pancytopenic by x-radiation. *New York State Journal of Medicine*, 53(5), 544–547.
282. Cowles, B. E., Meyers, K. M., Wardrop, K. J., Menard, M., & Sylvester, D. (1992). Prolonged Bleeding Time of Chediak-Higashi Cats Corrected by Platelet Transfusion. *Thrombosis and Haemostasis*, 67(6), 708–712. <https://doi.org/10.1055/s-0038-1648527>
283. Cronkite, E. P., & Brecher, G. (1954). The Experimental Therapy of the Hemorrhagic Phase of the Radiation Syndrome with Platelet Transfusions. *Acta Radiologica*, 116, 376–380.
284. Cronkite, E. P., Brecher, G., & Wilbur, K. M. (1954). Development and Use of a Canine Blood Donor Colony for Experimental Purposes. *Military Medicine*, 114(5), 359–365. <https://doi.org/10.1093/milmed/114.5.359>
285. Nakamura, R. K., Tompkins, E., & Bianco, D. (2012). Therapeutic options for immune-mediated thrombocytopenia: IMT therapy. *Journal of Veterinary Emergency and Critical Care*, 22(1), 59–72. <https://doi.org/10.1111/j.1476-4431.2011.00705.x>
286. Roy, A. J., & Djerassi, I. (1972). Effects of Platelet Transfusions: Plug Formation and Maintenance of Vascular Integrity. *Experimental Biology and Medicine*, 139(1), 137–142. <https://doi.org/10.3181/00379727-139-36096>
287. Scheepers, E., Leisewitz, A. L., Thompson, P. N., & Christopher, M. M. (2011). Serial haematology results in transfused and non-transfused dogs naturally infected with *Babesia rossi*. *Journal of the South African Veterinary Association*, 82(3), 136–143. <https://doi.org/10.4102/jsava.v82i3.51>
288. Valeri, C. R., Feingold, H., Melaragno, A. J., & Vecchione, J. J. (1986). Cryopreservation of dog platelets with dimethyl sulfoxide: Therapeutic effectiveness of cryopreserved platelets in the treatment of thrombocytopenic dogs, and the effect of platelet storage at -80 degrees C. *Cryobiology*, 23(5), 387–394. [https://doi.org/10.1016/0011-2240\(86\)90023-4](https://doi.org/10.1016/0011-2240(86)90023-4)
